# Supplementary material
Source: MDPI journal article supplement (https://www.mdpi.com/2075-4701/9/1/96)
Supplement: s1 [file s1]

Supplementary Materials

# Fe-Si-Al Coatings with Stable Wear-resistance Prepared by Laser Cladding Industrial Wastes

**Xue Liu <sup>1,\*</sup>, Bin-Bin Ma <sup>1,2</sup>, Li-Wei Hu <sup>1</sup>, Jin-Feng Li <sup>1</sup>, Feng-Sheng Qu <sup>1</sup>, Guo-Min Le <sup>1,\*</sup> and Xiu-Yan Li <sup>2,\*</sup>**

<sup>1</sup> Institute of Materials, China Academy of Engineering Physics, Mianyang 621907, China;  
mabinbinthe@126.com (B.B.M.); ysdxhlw@163.com (L.W.H.); lijinfeng305@126.com (J.F.L.);  
qufengsheng@163.com (F.S.Q.)

<sup>2</sup> College of Physics and Optoelectronics, Taiyuan University of Technology, Taiyuan 030024, China

\* Correspondence: xueliuthu@126.com (X.L.); leguomin@caep.cn (G.M.L.); lixiuyan@tyut.edu.cn (X.Y.L.);

Tel.: +86-028-65726372 (X.L.); +86-028-65726329 (G.M.L.); +86-028-65726372 (X.Y.L.)

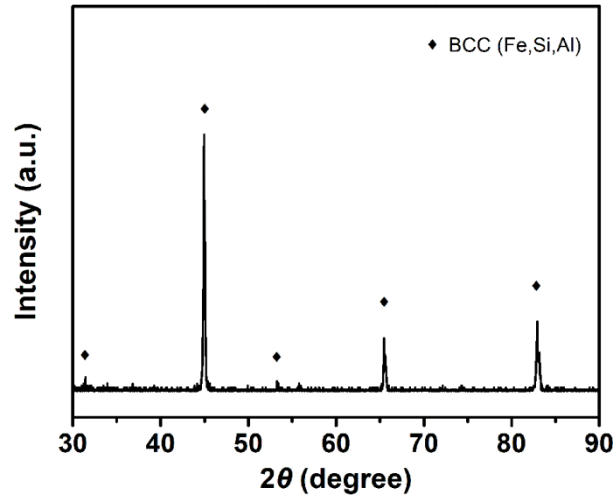

**Figure S1.** The XRD spectrum of the Fe-Si-Al powder.

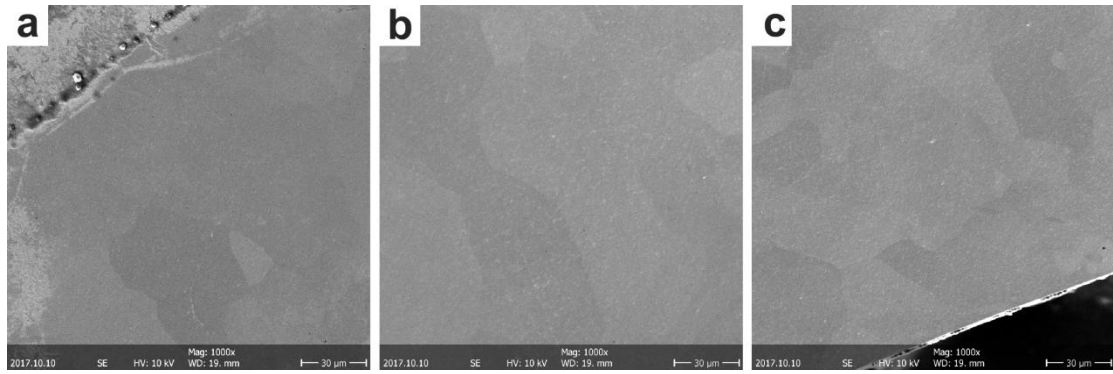

**Figure S2.** The SEM images of the cross-sectional profile of the cladded layer of coating specimen 5. (a) The bottom area of the coating. (b) The middle area of the of the coating. (c) The top area of the coating.

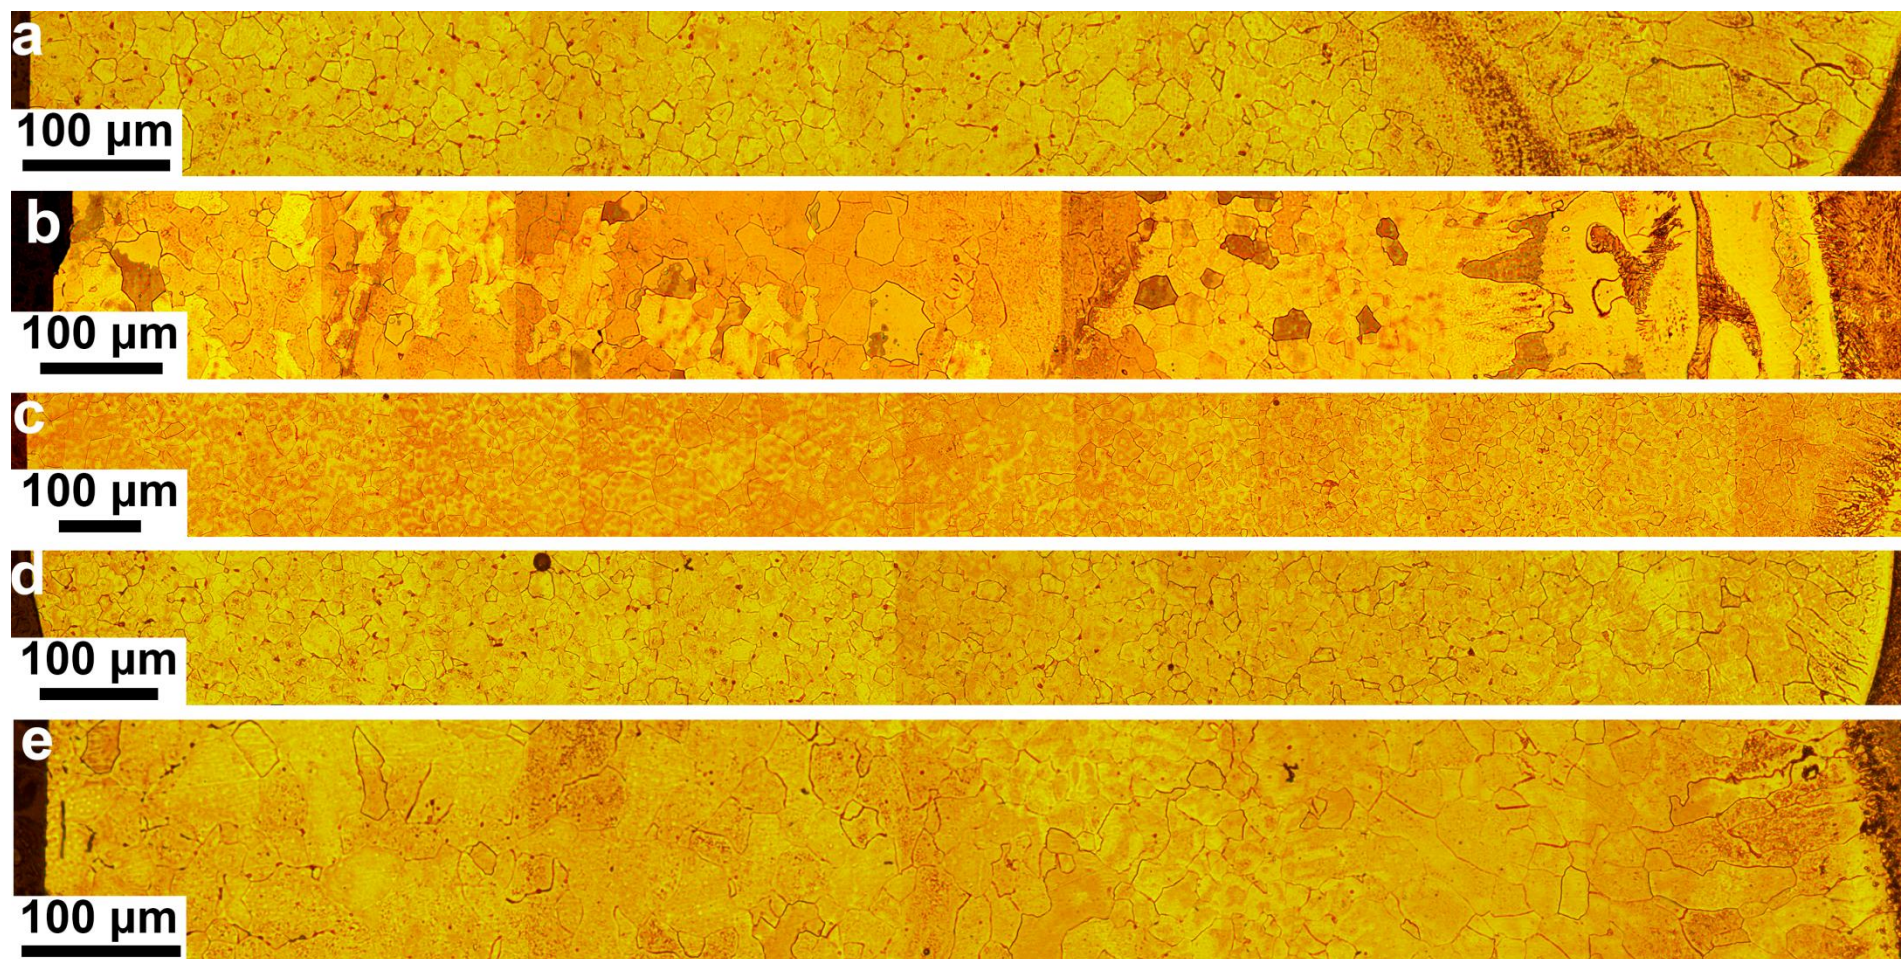

**Figure S3.** The optical microscope images of the cross-sectional profiles of the cladded layers of coating (a) specimen 1, (b) specimen 2, (c) specimen 3, (d) specimen 4 and (e) specimen 5.



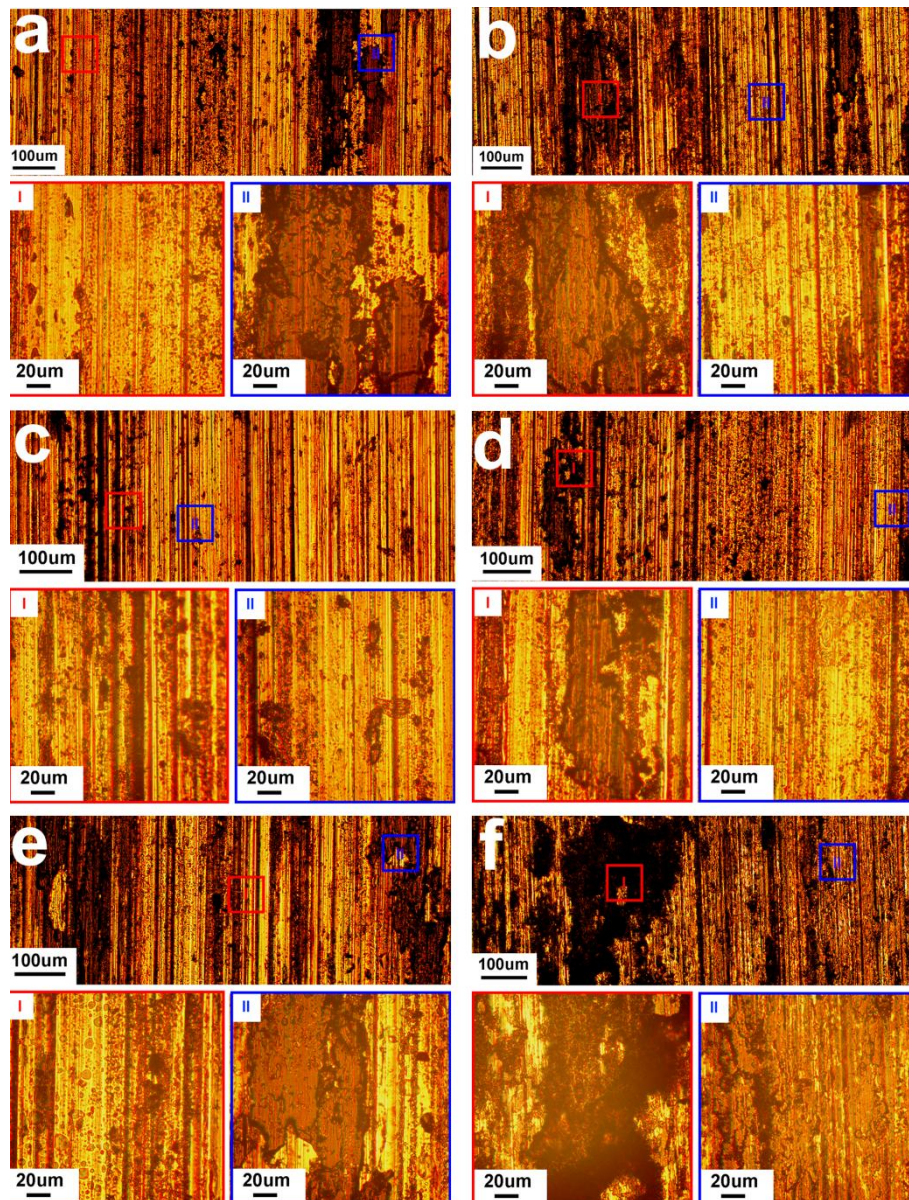

**Figure S4.** The optical microscope images of the wear scar of (a) the Fe-Si-Al coating specimen 1, (b) the Fe-Si-Al coating specimen 2, (c) the Fe-Si-Al coating specimen 3, (d) the Fe-Si-Al coating specimen 4, and (e) the Fe-Si-Al coating specimen 5, and (f) the 1045 carbon steel.
